# Supplementary material for: Impact of Stove Renovation on PM2.5 Exposure, Risk Perception, Self-Protective Willingness of Rural Residents
Source: MDPI journal article supplement (doi:10.3390/toxics11030245), 2023-03-05
Supplement: s1 [file s1]

# Supplementary Information

## Impact of Stove Renovation on PM<sub>2.5</sub> Exposure, Risk Perception, Protective Behavior, and Willingness to Pay of Rural Residents

Lei Huang<sup>1,2,\*</sup>, Yuxin Liu<sup>1,2</sup>, Yangyang Wu<sup>1,2</sup>, Ziwen Ye<sup>1,2</sup>, Futian Ren<sup>1,2</sup>, Xinlei Liu<sup>3</sup>, Guofeng Shen<sup>3</sup>

<sup>1</sup>State Key Laboratory of Pollution Control & Resource Reuse, School of the Environment, Nanjing University, Nanjing 210023, China

<sup>2</sup>Nanjing University (Suzhou) High-tech Institute, Suzhou 215123, China

<sup>3</sup>Laboratory for Earth Surface Processes, College of Urban and Environmental Sciences, Peking University, Beijing 100871, China

---

\* Corresponding author: Lei Huang; Email: huanglei@nju.edu.cn.

## Table of Content

**Text S1.** Questionnaire on the stove renovation.

**Table S1.** Instrument and tested parameter.

**Table S2.** Monthly mean outdoor PM<sub>2.5</sub> concentrations at 6 stations in Jincheng City, Shanxi Province.

**Table S3.** Sample structure.

**Table S4.** KMO and Bartlett's test of sphericity.

**Table S5.** Confirmatory factor analysis.

**Table S6.** Population data in Equation 1.

**Table S7.** Variance inflation factors of Model1~8.

**Table S8.** Description of willingness to pay.

**Table S9.** The original scores of the case and control group.

## Text S1:

### Questionnaire on the stove renovation

#### Part 1 Perceptions related to stove renovation projects

(1). How much do you know about the content of the project of stove renovation in your village?

1 2 3 4 5

Not at all Not much Average A lot Very much

(2). How much do you know about the difference between the new replacement stove and the original stove (daily coal consumption, smoke emission method, smoke emission)?

1 2 3 4 5

Not at all Not much Average A lot Very much

(3). How much do you know about the difference between bulk coal and clean coal?

1 2 3 4 5

Not at all Not much Average A lot Very much

(4). How often did you learn about the stove renovation project through the following sources?

Please check the box for the understanding method:

☐ Acquaintance communication ☐ Telephone ☐ Television ☐ Newspaper ☐ Broadcast

1 2 3 4 5

Never Occasionally Average Often Almost daily

(5). How was the indoor air environment in your home before the stove renovation (was it pungent)?

1 2 3 4 5

Very bad Fairly bad Average Fairly good Very good

(6). Did you experience discomfort when heating or cooking in the kitchen before the stove renovation?

1 2 3 4 5

Very uncomfortable Fairly uncomfortable Average Slightly uncomfortable No uncomfortable

(7). Do you think the original stove and coal had any effect on your health?

1 2 3 4 5

Not at all Fairly unaffected Average Partially affected Very affected

(8). Are you worried that the stove will cause inconvenience to your daily life during the renovation process?

1 2 3 4 5

Very worried Fairly worried Average Fairly unworried Unworried

(9). How has the stove renovation project made an overall difference in your family's quality of life in your opinion?

1 2 3 4 5

Much worse Fairly worse Average Fairly better Much better

(10). How much impact do you think that the stove renovation project has in your household air quality?

1 2 3 4 5

Not at all Not much Average A lot Very much

(11). How much do you support the stove renovation project?

1 2 3 4 5

Not at all Fairly unsupported Average Fairly supported Very supported

(12). How necessary do you think it is for the government to implement a stove renovation project?

1                      2                      3                      4                      5

Not at all      Basically unnecessary      Average      Fairly necessary      Very necessary

(13). How likely do you think the stove renovation project is to be rolled out?

1                      2                      3                      4                      5

Not at all      Basically unlikely      Average      Fairly likely      Very likely

(14). Do you think the stove renovation project can be implemented in accordance with the program?

1                      2                      3                      4                      5

Not at all      Basically impossible      Average      Basically possible      Completely possible

(15). Do you believe that the government can give a good treatment of household air pollution?

1                      2                      3                      4                      5

Not at all      Basically impossible      Average      Basically possible      Completely possible

(16). Do you believe the government can guarantee our residents access to cleaner and cheaper energy?

1                      2                      3                      4                      5

Not at all      Basically impossible      Average      Basically possible      Completely possible

## Part 2 Protective behaviours related to household air pollution

Below are some specific measures to alleviate health problems arising from household air pollution, please indicate whether you will take such action in the future (If you have already taken similar action and intend to continue to do so, please select "likely" or "very likely" as a response). Please mark the corresponding option with a tick. (1=very unlikely 2=unlikely 3=uncertain 4=likely 5=very likely)

|   | Items                         | 1 | 2 | 3 | 4 | 5 |
|---|-------------------------------|---|---|---|---|---|
| 1 | Opening windows               |   |   |   |   |   |
| 2 | Use or purchase air purifiers |   |   |   |   |   |
| 3 | Placing green plants          |   |   |   |   |   |

## Part 3 Willingness to pay for the stove renovation and clean coal

### Case group:

The stove renovation project can reduce harmful gas emissions, which has great health benefits, and clean coal burns more efficiently. At present, the stove purchase cost of the stove renovation project is all borne by the government, and the maximum subsidy for clean coal is 2.5 tons, and you need to purchase it by yourself later. What is the maximum amount you are willing to pay for clean coal each month?

|     |     |     |     |       |
|-----|-----|-----|-----|-------|
| 0   | 5   | 10  | 20  | 30    |
| 40  | 50  | 60  | 70  | 80    |
| 90  | 100 | 125 | 150 | 175   |
| 200 | 250 | 300 | 350 | _____ |

### Control group:

The stove renovation project can reduce harmful gas emissions and produce great health benefits. The cost for the government to promote this project is about 2,000-3,000 RMB/household and may be

partially subsidized. What is the maximum amount you are willing to pay for stove purchase?

|   |    |     |     |     |      |      |      |      |
|---|----|-----|-----|-----|------|------|------|------|
| 0 | 50 | 100 | 200 | 500 | 1000 | 1500 | 2000 | 3000 |
|---|----|-----|-----|-----|------|------|------|------|

Clean coal is better quality than the original bulk coal, produces less harmful gases from burning, and burns more efficiently. What is the maximum amount you are willing to pay for clean coal each month?

|     |     |     |      |       |
|-----|-----|-----|------|-------|
| 0   | 1   | 2   | 5    | 8     |
| 10  | 20  | 50  | 80   | 100   |
| 200 | 300 | 400 | 500  | 600   |
| 700 | 800 | 900 | 1000 | _____ |

#### Part 4 Basic information of respondents

1. Gender: ☐Male ☐Female

2. Name: \_\_\_\_\_

3. Tel: \_\_\_\_\_

4. Age: \_\_\_\_\_

5. Height: \_\_\_\_\_(cm), Weight: \_\_\_\_\_(kg)

6. Marital status: ☐Unmarried ☐Married ☐Divorced ☐Widowed

7. How many members in your family? \_\_\_\_\_(Permanent population)

8. Which is your mode of residence? (You can choose more than one option.)

☐ Live alone ☐ Live with spouse ☐ Live with parents ☐ Live with children ☐ Others\_\_

9. Your highest level of education: ☐ Uneducated ☐ Primary ☐ Junior high ☐ High/Vocational high ☐ University/College ☐ Graduate student and above

10. Your monthly per capita household income: (Permanent population) ☐None ☐<500yuan  
☐500-999yuan ☐1000-1999yuan ☐2000-2999yuan ☐3000-3999yuan ☐4000-4999yuan ☐>5000yuan

11. Occupation of family members: (Permanent population; You can choose more than one option.)

☐Student ☐worker ☐ Retiree ☐ Unemployed or laid-off workers ☐ Professional technicians (Doctor, teacher et al.) ☐ Administrators (village councils) ☐ Commercial, service personnel ☐Farmer ☐ Housewife ☐Others\_\_\_\_\_

12 How do you think your health is?

1                      2                      3                      4                      5  
 Very poor      Fairly poor      Average      Fairly healthy      Very healthy

13 Do you have social security? ☐Yes ☐No

Do you have other health insurance? ☐Yes ☐No

14 Have you been diagnosed by a hospital with any of the following health conditions? (You can choose more than one option.)

☐Diabetes ☐Hypertension ☐High blood pressure ☐High cholesterol ☐Coronary heart disease ☐Angina pectoris ☐Myocardial infarction ☐Stroke ☐Other cardiovascular disease  
☐Emphysema ☐Chronic bronchitis ☐Asthma ☐Other respiratory disease ☐Acute renal failure  
☐Pharyngitis ☐Cancer \_\_\_\_\_ ☐I have never been diagnosed with these problems.

15 Have you ever been hospitalized or seen an emergency room for respiratory diseases such as bronchitis/bronchitis, laryngitis, lung cancer, etc.? ☐Yes ☐No

16 What is your drinking status?

☐Never ☐1-3times/month ☐4-6times/month ☐2-3times/week ☐almost daily

17 Do you smoke?

☐Yes,\_\_\_cigarette(s) per day;

☐ No, are there colleagues or family members around you who smoke regularly?

Your relationship with a smoker is: \_\_\_\_\_; he (she) has smoked \_\_\_\_\_ (year), \_\_\_\_\_ (cigarette /day).

**18** How often do you exercise?

☐ Never      ☐ 1-3times/month      ☐ 4-6times/month      ☐ 2-3times/week      ☐ almost daily

Exercises were performed by \_\_\_\_\_.

**Table S1.** Instrument and tested parameter.

| Parameter         | Instrument        | Resolution          | Measuring range         | Uncertainty                                                                                                         |
|-------------------|-------------------|---------------------|-------------------------|---------------------------------------------------------------------------------------------------------------------|
| PM <sub>2.5</sub> | Plantower PMS7003 | 1 µg/m <sup>3</sup> | ≥1000 µg/m <sup>3</sup> | ±10 µg/m <sup>3</sup> @0~100µg/m <sup>3</sup><br>±10%@100~500 µg/m <sup>3</sup><br>±10%~±20%@>500 µg/m <sup>3</sup> |

**Table S2.** Monthly mean outdoor PM<sub>2.5</sub> concentrations at 6 stations in Jincheng City, Shanxi Province. (Unit:  $\mu\text{g}/\text{m}^3$ )

| Month   | Station1 <sup>1</sup> | Station2 | Station3 | Station4 | Station5 | Station6 | Mean    |
|---------|-----------------------|----------|----------|----------|----------|----------|---------|
| 2019-12 | 64.797                | 61.150   | 62.342   | 64.070   | 58.914   | 44.992   | 59.378  |
| 2020-01 | 115.392               | 108.889  | 112.135  | 115.118  | 104.662  | 96.524   | 108.787 |
| 2020-02 | 51.522                | 49.339   | 49.345   | 50.841   | 49.778   | 42.548   | 48.896  |
| 2020-03 | 42.200                | 39.465   | 38.756   | 39.302   | 39.011   | 30.587   | 38.220  |
| Mean    | 68.478                | 64.711   | 65.644   | 67.333   | 63.091   | 53.663   | 63.820  |

<sup>1</sup> Note: “Station1” is “The Water Company”, “Station2” is “Baiyun Trade”, “Station3” is “Municipal Environmental Protection Bureau”, “Station4” is “Technical College”, “Station5” is “Zezhou No.1 Middle School”, and “Station6” is “White Horse Temple”. The above stations are all state-controlled stations in Jincheng City, Shanxi Province.



**Table S3.** Sample structure.

| Variables          | Sort                     | Case group (N=97) |             | Control group (N=108) |             |
|--------------------|--------------------------|-------------------|-------------|-----------------------|-------------|
|                    |                          | N                 | Percent (%) | N                     | Percent (%) |
| Gender             | Female                   | 51                | 52.6        | 48                    | 44.4        |
|                    | Male                     | 46                | 47.4        | 60                    | 55.6        |
| Age                | <50                      | 29                | 29.9        | 29                    | 26.9        |
|                    | 50-59                    | 31                | 32.0        | 46                    | 42.6        |
|                    | >=60                     | 37                | 38.1        | 33                    | 30.6        |
| Education          | Primary school and below | 46                | 47.4        | 39                    | 36.1        |
|                    | Junior high and above    | 51                | 52.6        | 69                    | 63.9        |
| Income             | <2000                    | 61                | 62.9        | 69                    | 63.9        |
|                    | >=2000                   | 36                | 37.1        | 39                    | 36.1        |
| Family size        | <=2                      | 35                | 36.1        | 64                    | 59.3        |
|                    | >2                       | 62                | 63.9        | 44                    | 40.7        |
| BMI                | <23                      | 58                | 59.8        | 44                    | 40.7        |
|                    | >=23                     | 39                | 40.2        | 64                    | 59.3        |
| Physical condition | Healthy                  | 58                | 59.8        | 70                    | 64.8        |
|                    | Unhealthy                | 39                | 40.2        | 38                    | 35.2        |
| Exercise           | Non-exerciser            | 64                | 66.0        | 92                    | 85.2        |
|                    | Exerciser                | 33                | 34.0        | 16                    | 14.8        |

**Table S4.** KMO and Bartlett's test of sphericity.

|                               |                        | Case group | Control group |
|-------------------------------|------------------------|------------|---------------|
| KMO                           |                        | 0.81       | 0.78          |
| Bartlett's Test of Sphericity | Approximate chi-square | 750.22     | 1746.92       |
|                               | Degree of freedom      | 120        | 120           |
|                               | Significance           | 0.00       | 0.00          |

**Table S5.** Confirmatory factor analysis.

|               | GFI         | CFI         | NFI         | RMSEA       |
|---------------|-------------|-------------|-------------|-------------|
| Case group    | 0.851 >0.80 | 0.928 >0.90 | 0.823 >0.80 | 0.074 <0.08 |
| Control group | 0.862 >0.80 | 0.967 >0.90 | 0.918 >0.90 | 0.076 <0.08 |

**Table S6.** Population data in Equation 1<sup>1</sup>.

| Areas                             |                             | Pop (million) | I <sub>0</sub> (‰) |
|-----------------------------------|-----------------------------|---------------|--------------------|
| Rural areas of Jincheng City      |                             | 0.92          | 5.30               |
| Rural areas of Shanxi Province    |                             | 15.08         | 5.85               |
| Rural areas in north China region | Beijing                     | 2.89          | 5.49               |
|                                   | Tianjin                     | 2.58          | 5.30               |
|                                   | Hebei Province              | 32.17         | 6.12               |
|                                   | Shanxi Province             | 15.08         | 5.85               |
|                                   | Inner Mongolia Municipality | 9.30          | 5.66               |

<sup>1</sup>Note: the data in the table all came from *National Bureau of Statistics of China*.

**Table S7.** Variance inflation factors of Model1~8.

| Variables          | Case group | Control group |
|--------------------|------------|---------------|
| Gender             | 1.175      | 1.346         |
| Age                | 2.109      | 1.918         |
| Education          | 1.397      | 1.273         |
| Family size        | 1.332      | 1.365         |
| Income             | 1.482      | 1.351         |
| BMI                | 1.105      | 1.155         |
| Physical condition | 1.311      | 1.325         |
| Exercise           | 1.394      | 1.202         |
| Familiarity        | 1.711      | 1.204         |
| Effect             | 1.155      | 1.216         |
| Benefit            | 1.297      | 1.591         |
| Support            | 2.210      | 2.983         |
| Trust              | 2.227      | 2.305         |

**Table S8.** Description of willingness to pay.

|                             | N   | Minimum | Maximum | Average | Standard Deviation |
|-----------------------------|-----|---------|---------|---------|--------------------|
| Case group-clean coal       | 97  | 0       | 700     | 115.52  | 120.864            |
| Control group-clean coal    | 108 | 0       | 500     | 87.78   | 98.347             |
| Control group-kitchen range | 108 | 0       | 3000    | 433.33  | 597.698            |

**Table S9.** The original scores of the case and control group.

| Variables              | Sort      | Group <sup>1</sup> | Familiarity | Benefit | Support | Trust | Windows <sup>3</sup> | Air purifiers | Plants <sup>4</sup> | Clean coal <sup>5</sup> |
|------------------------|-----------|--------------------|-------------|---------|---------|-------|----------------------|---------------|---------------------|-------------------------|
| Gender                 | Female    | 1                  | 2.49        | 3.45    | 3.78    | 3.92  | 4.41                 | 1.43          | 2.39                | 2.06                    |
|                        |           | 2                  | 0.16        | 3.20    | 3.35    | 3.60  | 3.96                 | 1.56          | 2.60                | 1.73                    |
|                        | Male      | 1                  | 2.96        | 3.46    | 3.98    | 4.14  | 4.59                 | 1.39          | 2.41                | 2.13                    |
|                        |           | 2                  | 0.48        | 3.43    | 3.56    | 3.59  | 4.02                 | 1.40          | 2.27                | 1.87                    |
| Age                    | <50       | 1                  | 2.64        | 3.39    | 3.76    | 4.00  | 4.79                 | 1.90          | 2.86                | 2.14                    |
|                        |           | 2                  | 0.36        | 3.36    | 3.39    | 3.63  | 4.24                 | 1.76          | 2.83                | 2.00                    |
|                        | 50-59     | 1                  | 3.06        | 3.62    | 4.12    | 4.17  | 4.65                 | 1.23          | 2.35                | 2.19                    |
|                        |           | 2                  | 0.29        | 3.29    | 3.44    | 3.64  | 4.00                 | 1.37          | 2.30                | 1.76                    |
|                        | ≥60       | 1                  | 2.47        | 3.36    | 3.77    | 3.93  | 4.14                 | 1.19          | 2.08                | 1.97                    |
|                        |           | 2                  | 0.36        | 3.35    | 3.57    | 3.52  | 3.76                 | 1.36          | 2.21                | 1.70                    |
| Education <sup>2</sup> | Lower     | 1                  | 2.52        | 3.46    | 3.78    | 3.93  | 4.43                 | 1.22          | 2.28                | 2.00                    |
|                        |           | 2                  | 0.26        | 3.21    | 3.37    | 3.47  | 3.59                 | 1.31          | 2.15                | 1.69                    |
|                        | Higher    | 1                  | 2.88        | 3.44    | 3.97    | 4.11  | 4.55                 | 1.59          | 2.51                | 2.18                    |
|                        |           | 2                  | 0.37        | 3.39    | 3.52    | 3.67  | 4.22                 | 1.57          | 2.57                | 1.87                    |
| Family size            | ≤2        | 1                  | 2.61        | 3.43    | 3.70    | 3.90  | 4.06                 | 1.37          | 2.29                | 2.03                    |
|                        |           | 2                  | 0.17        | 3.34    | 3.40    | 3.40  | 3.63                 | 1.34          | 2.19                | 1.53                    |
|                        | >2        | 1                  | 2.77        | 3.47    | 3.97    | 4.10  | 4.74                 | 1.44          | 2.47                | 2.13                    |
|                        |           | 2                  | 0.57        | 3.30    | 3.57    | 3.89  | 4.52                 | 1.66          | 2.75                | 2.20                    |
| Income                 | <2000     | 1                  | 2.49        | 3.40    | 3.81    | 4.02  | 4.38                 | 1.36          | 2.18                | 1.95                    |
|                        |           | 2                  | 0.23        | 3.28    | 3.47    | 3.62  | 4.04                 | 1.45          | 2.16                | 1.71                    |
|                        | ≥2000     | 1                  | 3.08        | 3.55    | 3.99    | 4.05  | 4.69                 | 1.50          | 2.78                | 2.33                    |
|                        |           | 2                  | 0.51        | 3.42    | 3.45    | 3.56  | 3.90                 | 1.51          | 2.87                | 1.97                    |
| Physical condition     | Healthy   | 1                  | 2.75        | 3.47    | 3.91    | 4.06  | 4.74                 | 1.38          | 2.43                | 2.10                    |
|                        |           | 2                  | 0.40        | 3.28    | 3.41    | 3.67  | 4.11                 | 1.47          | 2.43                | 1.81                    |
|                        | Unhealthy | 1                  | 2.64        | 3.43    | 3.83    | 3.97  | 4.13                 | 1.46          | 2.36                | 2.08                    |
|                        |           | 2                  | 0.22        | 3.41    | 3.56    | 3.47  | 3.76                 | 1.47          | 2.39                | 1.79                    |

<sup>1</sup> Note: “1” of group represents “case group”, and “2” of group represents “control group”.

<sup>2</sup> Note: “Lower” of education represents “Primary school and below”, and “Higher” represents “Junior high and above”.

<sup>3</sup> Note: “Windows” represents “Opening windows”.

<sup>4</sup> Note: “Plants” represents “Plants placement”.
